# Supplementary material
Source: Springer Nature journal article supplement (https://www.springermedizin.de/resource/supplementary/12889_2011_4149_MOESM6_ESM.pdf/9491262)
Supplement: MOESM6 [file 9491262]

| <b>TABLE 6. Multivariate analysis for factors associated with HIV among HSW of Larkana</b> |       |            |
|--------------------------------------------------------------------------------------------|-------|------------|
| Variable                                                                                   | OR    | CI         |
| <i>Living with</i>                                                                         |       |            |
| • Others                                                                                   | 1     | --         |
| • Alone                                                                                    | 0.53  | 0.11-2.53  |
| • Family or relatives                                                                      | 7.45  | 1.15-48.17 |
| • Friends                                                                                  | 1.73  | 0.32-9.36  |
| <i>Knowledge about possible ways of HIV Prevention</i>                                     |       |            |
| • Refraining from Sex                                                                      |       |            |
| ➤ Yes                                                                                      | 1     | --         |
| ➤ No                                                                                       | 11.93 | 3.4-41.08  |
| • Use of clean syringe                                                                     | 1     | --         |
| ➤ Yes                                                                                      | 2.99  | 1.031-8.67 |
| ➤ No                                                                                       |       |            |
| <i>Alcohol Use during intercourse</i>                                                      |       |            |
| ➤ No                                                                                       | 1     | --         |
| ➤ Yes                                                                                      | 6.36  | 2.77-17.79 |
